# Supplementary material for: Reproducibility and Robustness of a Liver Microphysiological System PhysioMimix LC12 under Varying Culture Conditions and Cell Type Combinations
Source: MDPI journal article supplement (doi:10.3390/bioengineering10101195), 2023-10-14

**Supplemental Table S1.** List of experiments included in each figure and the links to study protocols and data.

| Figure | Experiments included                                                                                  |
|--------|-------------------------------------------------------------------------------------------------------|
| 2      | CN Bio: 3,5,6,8,10,13,14,23,27                                                                        |
| 3      | CN Bio: 3,4,5,6,10,12,13,16,17,19,20,21,23,24,25,27,28,30 (also includes LAMPS),31<br>Mimetas: 6,8,12 |
| 4      | CN Bio: 4,10,16,19,20,21,23,24,25,27,30 (also includes LAMPS)                                         |
| 5      | CN Bio: 4,10,16,19,20,21,23,24,25,27,30 (also includes LAMPS)                                         |
| 6      | CN Bio: 3,4,10,16,19,21,23,24,25,27                                                                   |
| 7      | CN Bio: 22                                                                                            |
| 8      | CN Bio: 28                                                                                            |

| Exp#                     | Experiment name                                                                                                  | Database link                                                                                                 |
|--------------------------|------------------------------------------------------------------------------------------------------------------|---------------------------------------------------------------------------------------------------------------|
| <b>CNBio Experiments</b> |                                                                                                                  |                                                                                                               |
| 3                        | Liver CNBIO LC12 Study 1: TEX-VAL-PK-2021-08-19-Liver_CNBIO LC12_Exp.3_PHH (LZ HUM183231) with Midazolam         | <a href="https://mps.csb.pitt.edu/assays/assaystudy/593/">https://mps.csb.pitt.edu/assays/assaystudy/593/</a> |
| 4                        | Liver CNBIO LC12 Study 2: TEX-VAL-PK-2021-09-12-Liver_CNBIO LC12_Exp.4_PHH (TF-HU8373) with Midazolam            | <a href="https://mps.csb.pitt.edu/assays/assaystudy/594/">https://mps.csb.pitt.edu/assays/assaystudy/594/</a> |
| 5                        | Liver CNBIO LC12 Study 3: TEX-VAL-PK-2021-09-19-Liver_CNBIO LC12_Exp.5_PHH (TF-HU8300) with Midazolam            | <a href="https://mps.csb.pitt.edu/assays/assaystudy/679/">https://mps.csb.pitt.edu/assays/assaystudy/679/</a> |
| 6                        | Liver CNBIO LC12 Study 4: TEX-VAL-PK-2021-09-30-Liver_CNBIO LC12_Exp.6_PHH (LZ HUM182531) with Midazolam         | <a href="https://mps.csb.pitt.edu/assays/assaystudy/678/">https://mps.csb.pitt.edu/assays/assaystudy/678/</a> |
| 8                        | Liver CNBIO LC12 Study 5: TEX-VAL-CC-2021-11-24-Liver_CNBIO LC12_Exp.8_PHH (TF-HU8373) ± THP-1 with LPS          | <a href="https://mps.csb.pitt.edu/assays/assaystudy/701/">https://mps.csb.pitt.edu/assays/assaystudy/701/</a> |
| 10                       | Liver CNBIO LC12 Study 7: TEX-VAL-PK-2021-11-29-Liver_CNBIO LC12_Exp.10_PHH (TF-HU8373) with Midazolam_2nd       | <a href="https://mps.csb.pitt.edu/assays/assaystudy/728/">https://mps.csb.pitt.edu/assays/assaystudy/728/</a> |
| 12                       | Liver CNBIO LC12 Study 9: TEX-VAL-PK-2022-01-16-Liver_CNBIO LC12_Exp.12_iHep with Midazolam_2nd                  | <a href="https://mps.csb.pitt.edu/assays/assaystudy/778/">https://mps.csb.pitt.edu/assays/assaystudy/778/</a> |
| 13                       | Liver CNBIO LC12 Study 10: TEX-VAL-PK-2022-02-18-Liver_CNBIO LC12_Exp.13_iHep ± NPCs with Midazolam              | <a href="https://mps.csb.pitt.edu/assays/assaystudy/894/">https://mps.csb.pitt.edu/assays/assaystudy/894/</a> |
| 14                       | Liver CNBIO LC12 Study 11: TEX-VAL-CC-2022-02-19-CNBIO LC12_Exp.14_Exp.14_PHH + THP-1, Trovafloxacin ± LPS (2nd) | <a href="https://mps.csb.pitt.edu/assays/assaystudy/965/">https://mps.csb.pitt.edu/assays/assaystudy/965/</a> |
| 16                       | Liver CNBIO LC12 Study 13: TEX-VAL-PK-2022-06-01-CNBIO LC12_Exp.16_PHH ± THP-1 with Midazolam                    | <a href="https://mps.csb.pitt.edu/assays/assaystudy/966/">https://mps.csb.pitt.edu/assays/assaystudy/966/</a> |

|                            |                                                                                                                              |                                                                                                                 |
|----------------------------|------------------------------------------------------------------------------------------------------------------------------|-----------------------------------------------------------------------------------------------------------------|
| 17                         | Liver CNBIO LC12 Study 14: TEX-VAL-PK-2022-06-08-CNBIO LC12_Exp.17_iHep ± NPCs with Midazolam (2nd)                          | <a href="https://mps.csb.pitt.edu/assays/assaystudy/968/">https://mps.csb.pitt.edu/assays/assaystudy/968/</a>   |
| 19                         | Liver CNBIO LC12 Study 16: TEX-VAL-PK-2022-06-21-CNBIO LC12_Exp.19_PHH ± THP-1 with Midazolam (2nd)                          | <a href="https://mps.csb.pitt.edu/assays/assaystudy/969/">https://mps.csb.pitt.edu/assays/assaystudy/969/</a>   |
| 20                         | Liver CNBIO LC12 Study 17: TEX-VAL-PK-2022-07-19-CNBIO LC12_Exp.20_PHH ± primary NPCs, basal function (2nd)                  | <a href="https://mps.csb.pitt.edu/assays/assaystudy/970/">https://mps.csb.pitt.edu/assays/assaystudy/970/</a>   |
| 21                         | Liver CNBIO LC12 Study 18: TEX-VAL-PK-2022-07-19-CNBIO LC12_Exp.21_PHH ± THP-1 with Midazolam (3rd)                          | <a href="https://mps.csb.pitt.edu/assays/assaystudy/971/">https://mps.csb.pitt.edu/assays/assaystudy/971/</a>   |
| 22                         | Liver CNBIO LC12 Study 19: TEX-VAL-PK-2022-07-28-CNBIO LC12_Exp.22_PHH ± THP-1 with 20 pesticide mixture                     | <a href="https://mps.csb.pitt.edu/assays/assaystudy/972/">https://mps.csb.pitt.edu/assays/assaystudy/972/</a>   |
| 23                         | Liver CNBIO LC12 Study 20: TEX-VAL-PK-2022-08-13-CNBIO LC12_Exp.23_PHH ± primary NPCs, basal function (3rd)                  | <a href="https://mps.csb.pitt.edu/assays/assaystudy/973/">https://mps.csb.pitt.edu/assays/assaystudy/973/</a>   |
| 24                         | Liver CNBIO LC12 Study 21: TEX-VAL-PK-2022-09-13-CNBIO LC12_Exp.24_PHH ± THP-1 with Midazolam (4th), old vs. new plate       | <a href="https://mps.csb.pitt.edu/assays/assaystudy/974/">https://mps.csb.pitt.edu/assays/assaystudy/974/</a>   |
| 25                         | Liver CNBIO LC12 Study 22: TEX-VAL-PK-2022-09-21-CNBIO LC12_Exp.25_PHH ± primary NPCs, basal function (4th)                  | <a href="https://mps.csb.pitt.edu/assays/assaystudy/975/">https://mps.csb.pitt.edu/assays/assaystudy/975/</a>   |
| 27                         | Liver CNBIO LC12 Study 24: TEX-VAL-PK-2022-11-02-CNBIO LC12_Exp.27_PHH ± THP-1 with Midazolam; 2 PHH donors                  | <a href="https://mps.csb.pitt.edu/assays/assaystudy/978/">https://mps.csb.pitt.edu/assays/assaystudy/978/</a>   |
| 28                         | Liver CNBIO LC12 Study 25: TEX-VAL-CC-2022-12-02-CNBIO LC12_Exp.28_PHH + THP-1, Trovafloxacin ± LPS (3rd)                    | <a href="https://mps.csb.pitt.edu/assays/assaystudy/979/">https://mps.csb.pitt.edu/assays/assaystudy/979/</a>   |
| 30                         | Liver CNBIO LC12 Study 27: TEX-VAL-CC-2023-01-24-CNBIO LC12_Exp.30_PHH ± THP-1, EaHy926, LX-2, vs. LAMPS                     | <a href="https://mps.csb.pitt.edu/assays/assaystudy/1043/">https://mps.csb.pitt.edu/assays/assaystudy/1043/</a> |
| 31                         | Liver CNBIO LC12 Study 28: TEX-VAL-PK-2023-04-14-CNBIO LC12_Exp.31_PHH ± THP-1 28-day study                                  | <a href="https://mps.csb.pitt.edu/assays/assaystudy/1114/">https://mps.csb.pitt.edu/assays/assaystudy/1114/</a> |
| <b>Mimetas Experiments</b> |                                                                                                                              |                                                                                                                 |
| 6                          | Liver Mimetas 2-lane Study 6: TEX-VAL-PK-2021-08-30-Liver_Mimetas 2-lane_Exp.6_iHep ± NPCs with Five Chemical Cocktail       | <a href="https://mps.csb.pitt.edu/assays/assaystudy/680/">https://mps.csb.pitt.edu/assays/assaystudy/680/</a>   |
| 8                          | Liver Mimetas 2-lane Study 8: TEX-VAL-PK-2021-10-13-Liver_Mimetas 2-lane_Exp.8_iHep ± NPCs with Midazolam                    | <a href="https://mps.csb.pitt.edu/assays/assaystudy/681/">https://mps.csb.pitt.edu/assays/assaystudy/681/</a>   |
| 12                         | Liver Mimetas 2-lane Study 12: TEX-VAL-TOX-2022-02-11-Liver_Mimetas 2-lane_Exp.13_iHep and NPCs with Trovafloxacin ± LPS_2nd | <a href="https://mps.csb.pitt.edu/assays/assaystudy/759/">https://mps.csb.pitt.edu/assays/assaystudy/759/</a>   |
| <b>LAMPS Experiments</b>   |                                                                                                                              |                                                                                                                 |
| 30                         | Liver CNBIO LC12 Study 27: TEX-VAL-CC-2023-01-24-CNBIO LC12_Exp.30_PHH ± THP-1, EaHy926, LX-2, vs. LAMPS                     | <a href="https://mps.csb.pitt.edu/assays/assaystudy/1043/">https://mps.csb.pitt.edu/assays/assaystudy/1043/</a> |
| <b>2D PHH Experiments</b>  |                                                                                                                              |                                                                                                                 |

|                            |                                                                                                             |                                                                                                               |
|----------------------------|-------------------------------------------------------------------------------------------------------------|---------------------------------------------------------------------------------------------------------------|
| 4                          | Liver CNBIO LC12 Study 2: TEX-VAL-PK-2021-09-12-Liver_CNBIO LC12_Exp.4_PHH (TF-HU8373) with Midazolam       | <a href="https://mps.csb.pitt.edu/assays/assaystudy/594/">https://mps.csb.pitt.edu/assays/assaystudy/594/</a> |
| 10                         | Liver CNBIO LC12 Study 7: TEX-VAL-PK-2021-11-29-Liver_CNBIO LC12_Exp.10_PHH (TF-HU8373) with Midazolam_2nd  | <a href="https://mps.csb.pitt.edu/assays/assaystudy/728/">https://mps.csb.pitt.edu/assays/assaystudy/728/</a> |
| 16                         | Liver CNBIO LC12 Study 13: TEX-VAL-PK-2022-06-01-CNBIO LC12_Exp.16_PHH ± THP-1 with Midazolam               | <a href="https://mps.csb.pitt.edu/assays/assaystudy/966/">https://mps.csb.pitt.edu/assays/assaystudy/966/</a> |
| 21                         | Liver CNBIO LC12 Study 18: TEX-VAL-PK-2022-07-19-CNBIO LC12_Exp.21_PHH ± THP-1 with Midazolam (3rd)         | <a href="https://mps.csb.pitt.edu/assays/assaystudy/971/">https://mps.csb.pitt.edu/assays/assaystudy/971/</a> |
| 27                         | Liver CNBIO LC12 Study 24: TEX-VAL-PK-2022-11-02-CNBIO LC12_Exp.27_PHH ± THP-1 with Midazolam; 2 PHH donors | <a href="https://mps.csb.pitt.edu/assays/assaystudy/978/">https://mps.csb.pitt.edu/assays/assaystudy/978/</a> |
| <b>2D iHep Experiments</b> |                                                                                                             |                                                                                                               |
| 12                         | Liver CNBIO LC12 Study 9: TEX-VAL-PK-2022-01-16-Liver_CNBIO LC12_Exp.12_iHep with Midazolam_2nd             | <a href="https://mps.csb.pitt.edu/assays/assaystudy/778/">https://mps.csb.pitt.edu/assays/assaystudy/778/</a> |
| 13                         | Liver CNBIO LC12 Study 10: TEX-VAL-PK-2022-02-18-Liver_CNBIO LC12_Exp.13_iHep ± NPCs with Midazolam         | <a href="https://mps.csb.pitt.edu/assays/assaystudy/894/">https://mps.csb.pitt.edu/assays/assaystudy/894/</a> |
| 17                         | Liver CNBIO LC12 Study 14: TEX-VAL-PK-2022-06-08-CNBIO LC12_Exp.17_iHep ± NPCs with Midazolam (2nd)         | <a href="https://mps.csb.pitt.edu/assays/assaystudy/968/">https://mps.csb.pitt.edu/assays/assaystudy/968/</a> |

**Supplemental Table S2.** Cell types used in these studies.

| Vendor        | Cell type                                        | Lot Number      | Donor  | Race      | Age (yrs) | BMI  | Tobacco History | Alcohol History | Drug History | Cause of Death | Other Info                                                                                       |
|---------------|--------------------------------------------------|-----------------|--------|-----------|-----------|------|-----------------|-----------------|--------------|----------------|--------------------------------------------------------------------------------------------------|
| Thermo Fisher | Primary Human Hepatocytes                        | HU8300          | Male   | Caucasian | 31        | 21   | Yes             | Yes             | Yes          | n/a            |                                                                                                  |
| Thermo Fisher | Primary Human Hepatocytes                        | HU8373          | Female | Caucasian | 26        | 18.6 | Yes             | Yes             | Yes          | n/a            |                                                                                                  |
| Lonza         | Primary Human Hepatocytes                        | HUM182531       | Female | Caucasian | 51        | 25.7 | No              | Social          | No           | n/a            |                                                                                                  |
| Lonza         | Primary Human Hepatocytes                        | HUM183231       | Female | Caucasian | 50        | 28.8 | No              | Social          | No           | n/a            |                                                                                                  |
| LifeNet       | Primary Human Hepatocytes                        | 2122782-01      | Female | Caucasian | 31        | 27.8 | No              | No              | No           | CVA/Stroke     |                                                                                                  |
| Cell Systems  | Primary human liver sinusoidal endothelial cells | 566.01.01.01.1T | Female | Caucasian | 27        | 24.9 | n/a             | n/a             | n/a          | n/a            | no diabetes; no chemo                                                                            |
| LifeNet       | Primary human Kupffer cells                      | 2118082         | Female | Caucasian | 58        | 27.1 | Yes             | no              | no           | Anoxia         |                                                                                                  |
| LifeNet       | Primary human stellate cells                     | 2118082         | Female | Caucasian | 58        | 27.1 | Yes             | no              | no           | Anoxia         |                                                                                                  |
| FujiFilm      | iCell hepatocytes 2.0                            | 103664, 104926  | Female | Caucasian | <18       | n/a  | n/a             | n/a             | n/a          | n/a            | Healthy; fibroblast tissue source                                                                |
| ATCC          | HMEC-1                                           | n/a             | Male   | n/a       | <1        | n/a  | n/a             | n/a             | n/a          | n/a            | Endothelial-like immortalized cell line originally isolated from the endothelium of the foreskin |
| ATCC          | THP-1                                            | 70047549        | Male   | n/a       | 1         | n/a  | n/a             | n/a             | n/a          | n/a            | Monocyte isolated from peripheral blood from an acute monocytic leukemia patient                 |

**Supplemental Table S3.** Test chemicals and internal standards used in the study of mixtures of 20 pesticides.

| Chemical                  | Vendor        | Purity  | Catalog No. |
|---------------------------|---------------|---------|-------------|
| <b>Test chemicals</b>     |               |         |             |
| Aldrin                    | Chem Service  | 97.9%   | N-11049     |
| DDD-p,p'                  | Sigma-Aldrich | ≥98%    | 35486       |
| DDT-o,p'                  | Chem Service  | 99.5%   | N-12708     |
| DDT-p,p'                  | Sigma-Aldrich | ≥98%    | 31041       |
| Dicofol                   | Sigma-Aldrich | ≥98%    | 36677       |
| Dieldrin                  | Sigma-Aldrich | ≥95%    | 33491       |
| Endosulfan I              | Sigma-Aldrich | ≥98%    | 32015       |
| Endrin                    | Sigma-Aldrich | ≥98%    | 32014       |
| Heptachlor epoxide B      | Chem Service  | 99.5%   | N-12148     |
| Heptachlor                | Chem Service  | 98.6%   | N-12147     |
| Lindane                   | Sigma-Aldrich | ≥96.5%  | 233390      |
| Methoxychlor-o,p'         | Sigma-Aldrich | ≥98%    | 36161       |
| Parathion                 | Chem Service  | 98.4%   | N-12819     |
| Trifluralin               | Sigma-Aldrich | ≥98%    | 32061       |
| 2,4-Dinitrophenol         | Sigma-Aldrich | ≥98%    | 34334       |
| Azinphos-methyl           | Sigma-Aldrich | ≥95%    | 45333       |
| Chlorpyrifos              | Sigma-Aldrich | ≥98%    | 45395       |
| Diazinon                  | Sigma-Aldrich | ≥98%    | 45428       |
| Disulfoton                | Sigma-Aldrich | ≥98%    | 45460       |
| Ethion                    | Sigma-Aldrich | ≥95%    | 45477       |
| <b>Internal Standards</b> |               |         |             |
| Atrazine                  | Sigma-Aldrich | ≥ 98%   | 45330       |
| Benzo[a]anthracene        | Sigma-Aldrich | ≥ 98.5% | B2209       |
| Terbutryn                 | Sigma-Aldrich | ≥ 98%   | 45677       |
| Mifepristone              | Selleck Chem  | >99%    | S2606       |
|                           |               |         |             |
| Troglitazone              | Sigma-Aldrich | ≥ 98%   | T2573       |

**Supplemental Figure S1.** Intra-experimental variability (expressed as CV) of synthetic function and metabolic activity when using the PhysioMimix™ LC12 MPS with the same donor (HU8373) across different conditions of use.

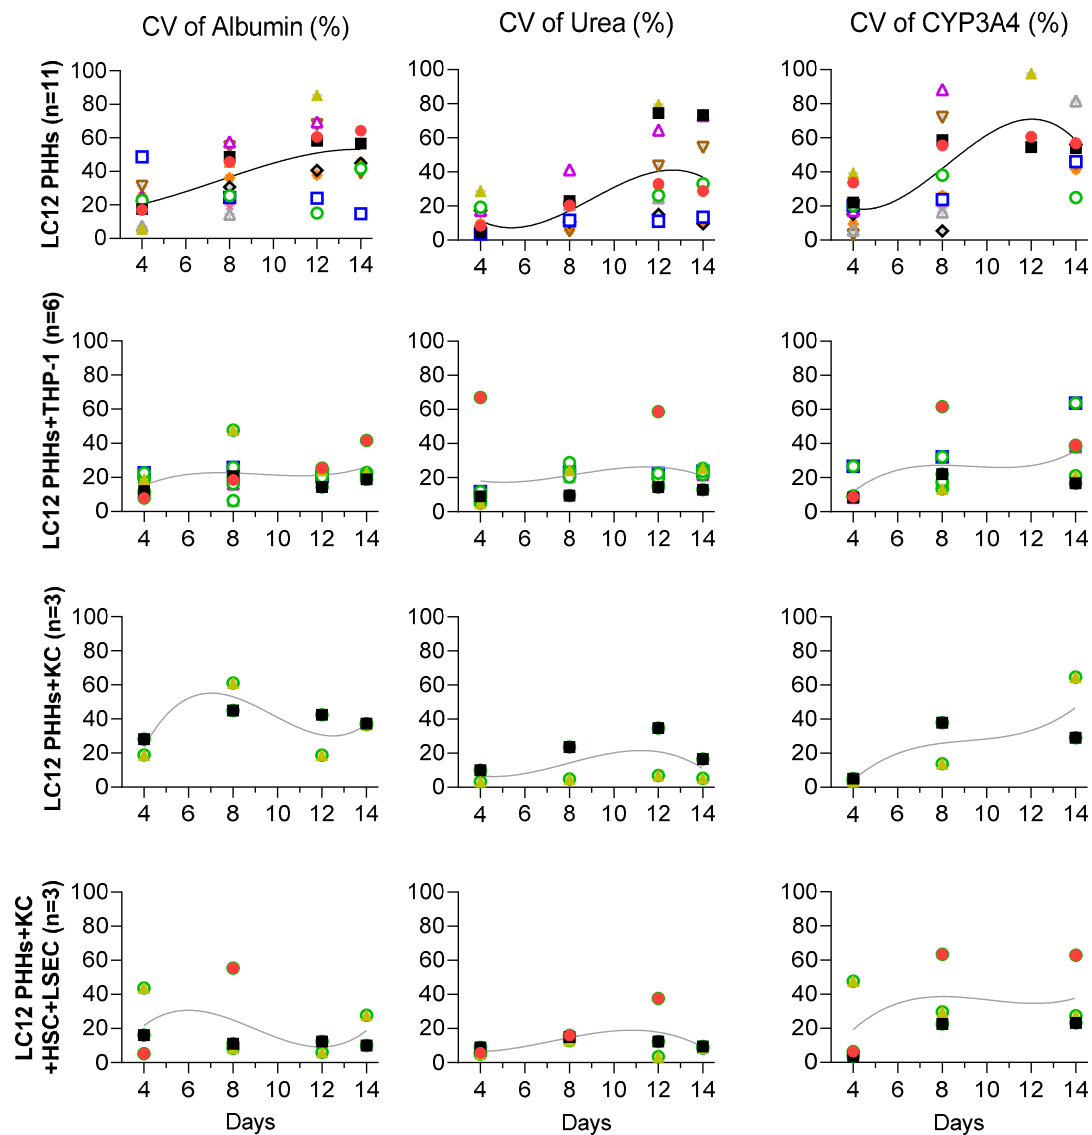

**Supplemental Figure S2.** Inter- and intra- experimental variability of synthetic function and metabolic activity when using the PhysioMimix™ LC12 MPS with iHeps with and without NPCs.

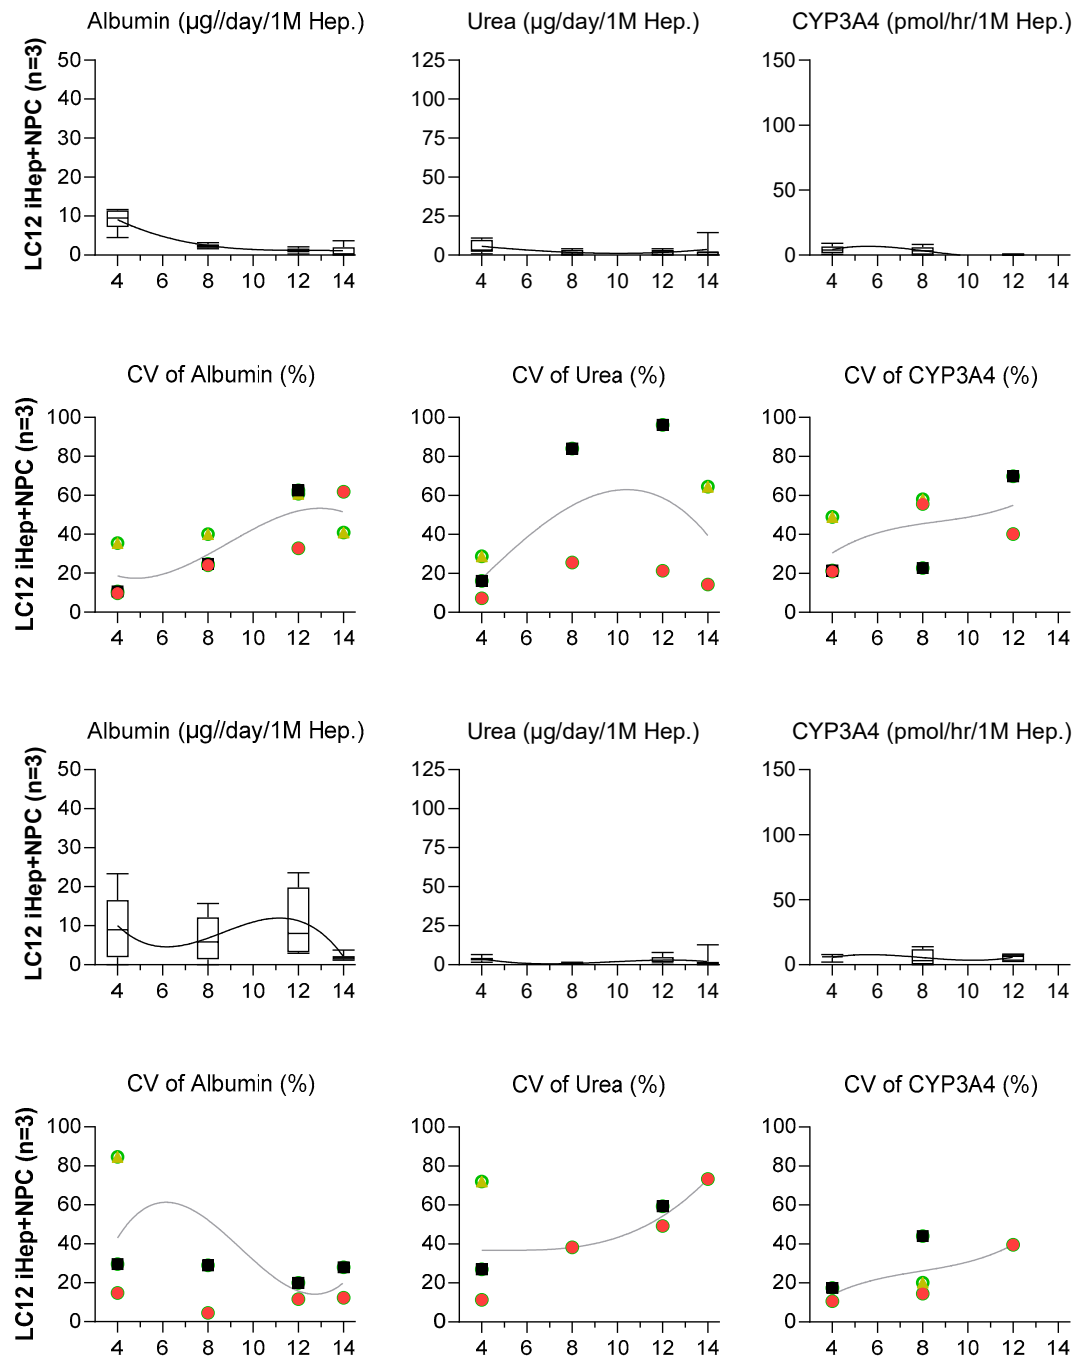

**Supplemental Figure S3.** Intra-experimental variability (expressed as CV) of metabolic function when using the PhysioMimix™ LC12 MPS with the same donor (HU8373) across different conditions of use.

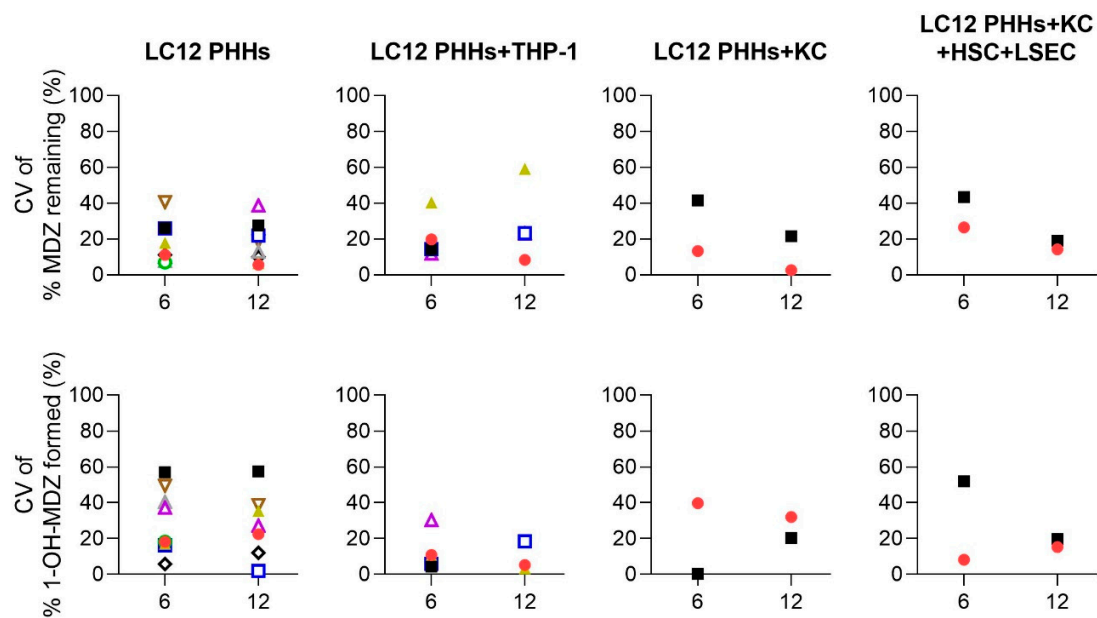

Supplement: s1 [file s1]
